# Supplementary material
Source: publisher figshare collection journal article supplement (https://acs.figshare.com/ndownloader/files/4850959)
Supplement: Supplementary file 1 [file 4850959]

## Supporting Information

# Facile Synthesis and Acetone Sensing Performance of Hierarchical SnO<sub>2</sub> Hollow Microspheres with Controllable Size and Shell Thickness

Jiao Li,<sup>†</sup> Pinggui Tang,<sup>\*,†,‡</sup> Jiajun Zhang,<sup>†</sup> Yongjun Feng,<sup>†</sup> Ruixian Luo,<sup>†</sup> Aifan Chen<sup>†</sup>  
and Dianqing Li<sup>\*,†,‡</sup>

<sup>†</sup>State Key Laboratory of Chemical Resource Engineering, and <sup>‡</sup>Beijing Engineering  
Center for Hierarchical Catalysts, Beijing University of Chemical Technology, Beijing  
100029, P.R. China

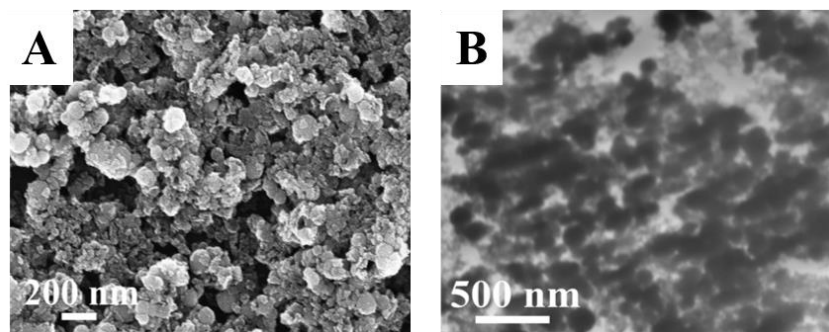

**Figure S1.** SEM (A) and TEM (B) images of SnO<sub>2</sub>-200-0.25.

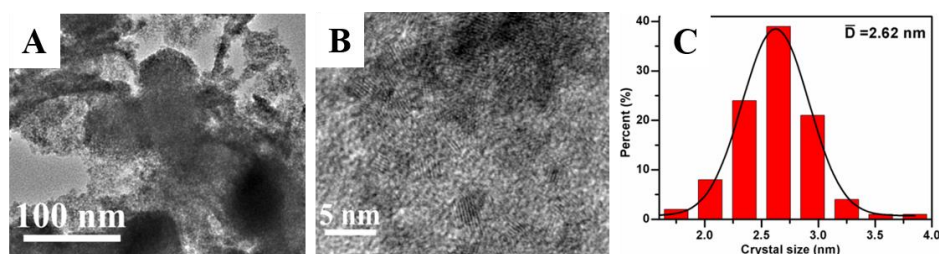

**Figure S2.** HRTEM (A and B) images and crystal size distribution (C) of SnO<sub>2</sub>-200-0.25.

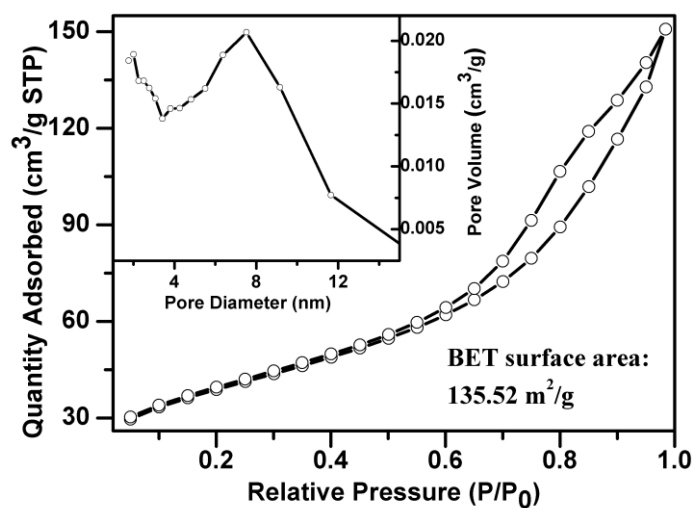

**Figure S3.** Nitrogen adsorption-desorption isotherms and pore size distribution (inset) of SnO<sub>2</sub>-200-0.25.
